# Supplementary material for: Improvement of the Li metal-electrolyte interfacial stability by cis–trans polar conformer formation in a carbonate electrolyte
Source: Royal Society of Chemistry journal article supplement (doi:10.1039/d3ta04673g), 2023-01-01
Supplement: d3ta04673g1.pdf [file d3ta04673g1.pdf]

## Supplementary Information

# Improvement of Li metal-electrolyte interfacial stability by *cis-trans* polar conformer formation in carbonate electrolyte

*Min A Lee<sup>ab</sup>, Han Jun Leem<sup>a</sup>, Jeong Beom Lee<sup>c</sup>, Chihyun Hwang<sup>a</sup>, Jisang Yu<sup>a,†</sup>, Hyun-seung Kim<sup>a,†</sup>*

*<sup>a</sup>Advanced Batteries Research Center, Korea Electronics Technology Institute, 25,*

*Saenari-ro, Seongnam 13509, Republic of Korea*

*<sup>b</sup>Department of Energy Engineering, Hanyang University, Seoul, 04763 Republic of Korea*

*<sup>c</sup>Department of Chemical and Biological Engineering, Seoul National Univeristy, Seoul, 08826, Republic of  
Korea*

*† Corresponding authors.*

*E-mail address:*

*jisang@keti.re.kr, hskim0113@keti.re.kr*

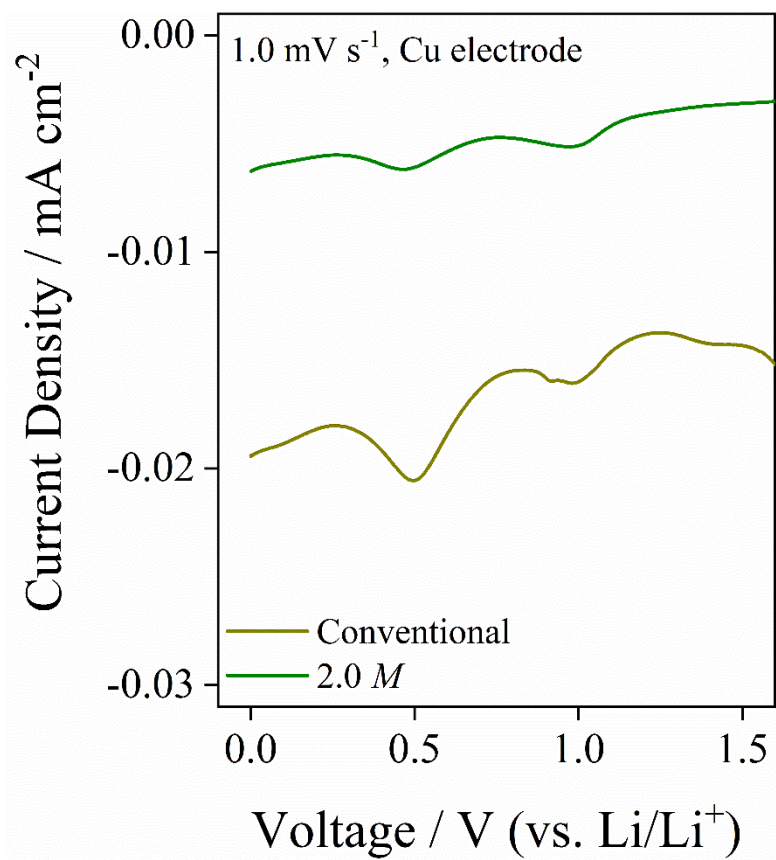

**Figure S1.** Linear sweep voltammogram obtained from coin type Cu/Li cells with conventional and 2.0 M conformer electrolytes

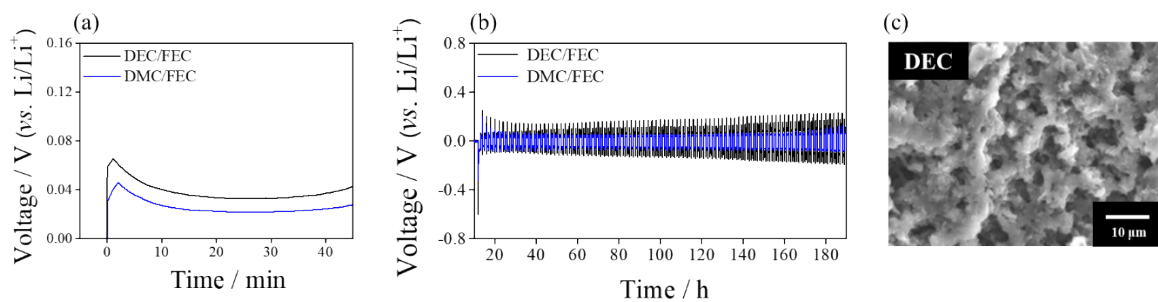

**Figure S2.** (a) Initial polarization, (b) time versus voltage curves obtained from conformer forming (DMC) and less forming (DEC) electrolytes, (c) *ex-situ* SEM image of fifth cycled Li metal with DEC-based electrolyte

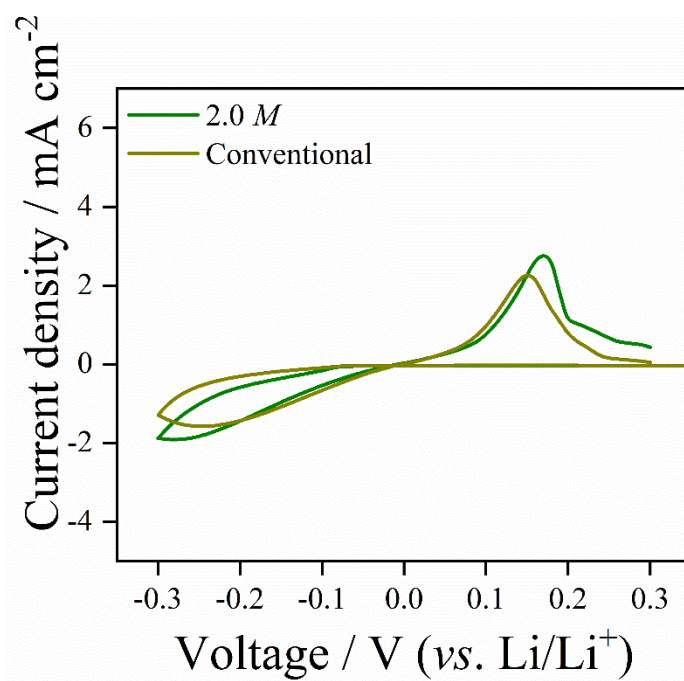

**Figure S3.** Cyclic voltammogram recorded from conventional and conformer electrolytes

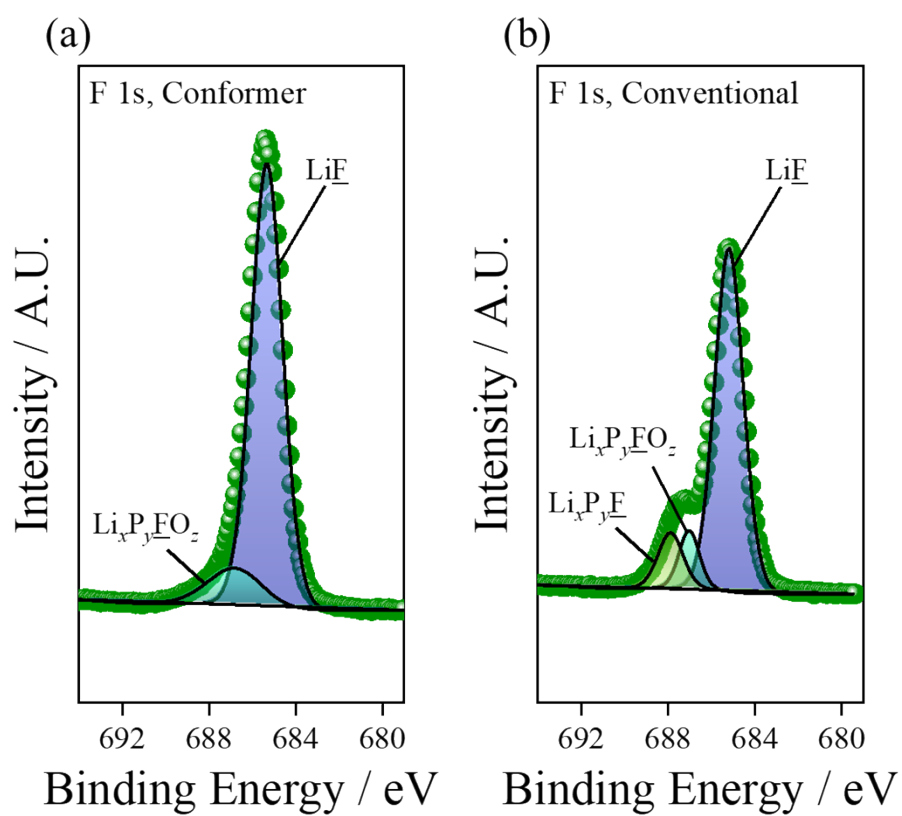

**Figure S4.** F 1s XPS spectrum obtained from lithium electrode with (a) conformer and (b) background electrolyte

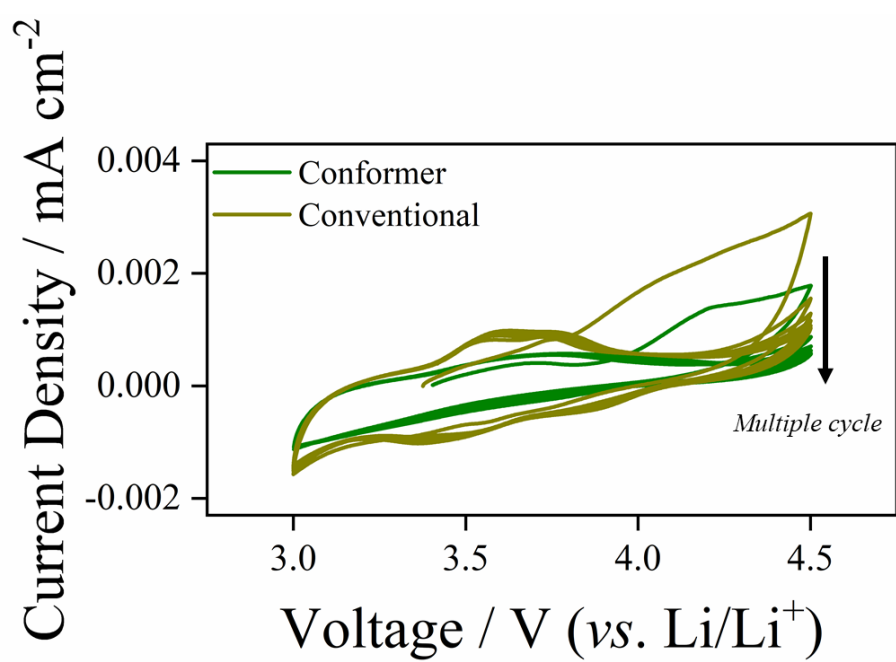

**Figure S5.** Cyclic voltammogram recorded from conventional and conformer electrolytes

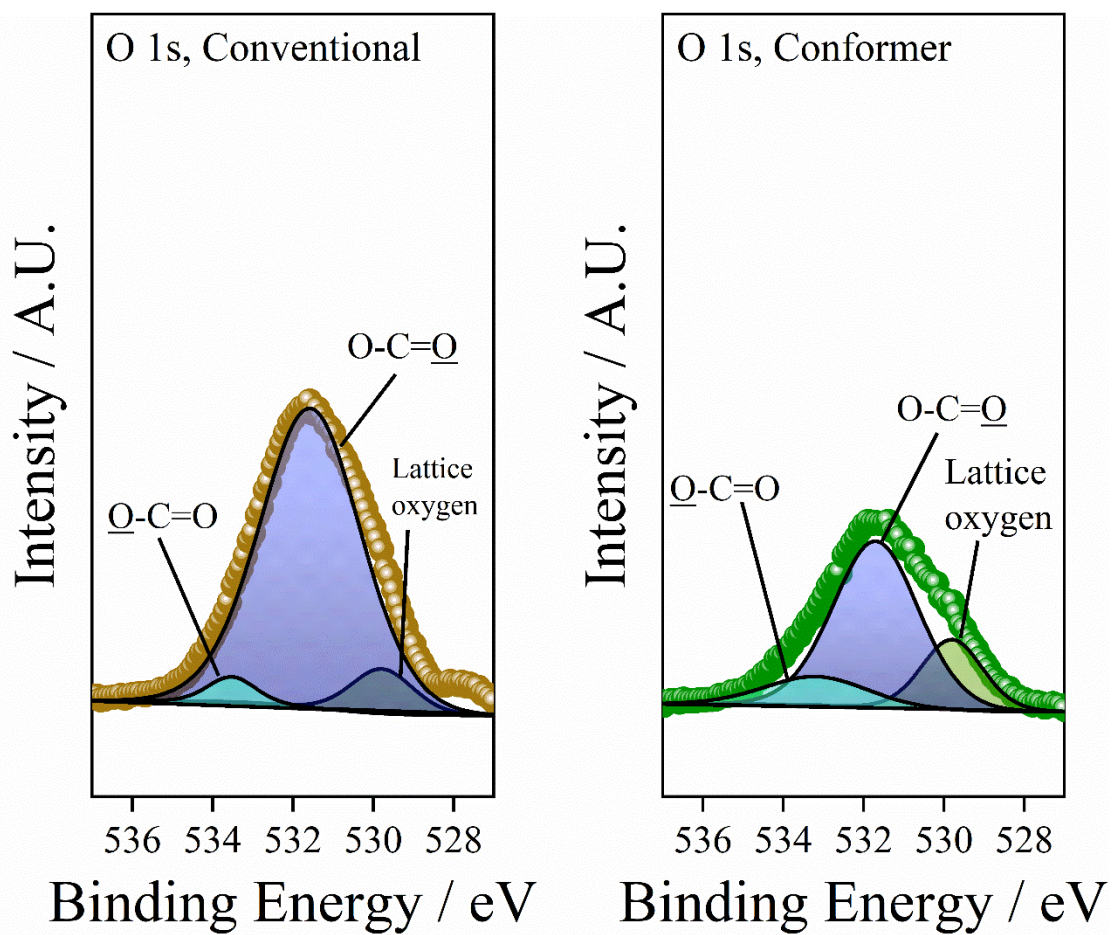

**Figure S6.** O 1s XPS spectra obtained from 60 s-etched NCM811 electrodes

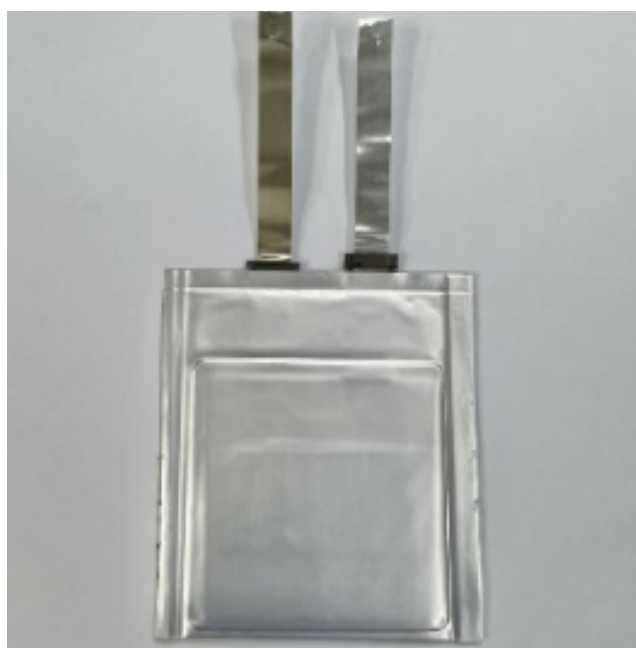

**Figure S7.** Optical image of fabricated lithium metal pouch cell



**Table S1.** Comparison with recently reported carbonate electrolytes for lithium metal batteries

| <b>Published Year</b> | <b>Applied positive electrode</b>                                      | <b>Evaluated Areal Capacity / mA h cm<sup>-2</sup></b> | <b>End-of-life cycle number</b> |
|-----------------------|------------------------------------------------------------------------|--------------------------------------------------------|---------------------------------|
| 2018 <sup>1</sup>     | NCA                                                                    | 2.50                                                   | 300                             |
| 2020 <sup>2</sup>     | LiNi <sub>0.8</sub> Co <sub>0.1</sub> Mn <sub>0.1</sub> O <sub>2</sub> | 2.50                                                   | 200                             |
| 2020 <sup>3</sup>     | LiNi <sub>0.8</sub> Co <sub>0.1</sub> Mn <sub>0.1</sub> O <sub>2</sub> | 1.30                                                   | 80                              |
| 2021 <sup>4</sup>     | LiNi <sub>0.8</sub> Co <sub>0.1</sub> Mn <sub>0.1</sub> O <sub>2</sub> | 2.50                                                   | 200                             |
| 2021 <sup>5</sup>     | NCA                                                                    | 1.65                                                   | 150                             |
| 2021 <sup>6</sup>     | LiNi <sub>0.8</sub> Co <sub>0.1</sub> Mn <sub>0.1</sub> O <sub>2</sub> | 2.62                                                   | 200                             |
| 2021 <sup>7</sup>     | LiNi <sub>0.6</sub> Co <sub>0.2</sub> Mn <sub>0.2</sub> O <sub>2</sub> | 0.68                                                   | 100                             |
| 2021 <sup>8</sup>     | LiNi <sub>0.6</sub> Co <sub>0.2</sub> Mn <sub>0.2</sub> O <sub>2</sub> | 0.50                                                   | 200                             |
| 2021 <sup>9</sup>     | LiNi <sub>0.6</sub> Co <sub>0.2</sub> Mn <sub>0.2</sub> O <sub>2</sub> | 3.50                                                   | 120                             |
| 2022 <sup>10</sup>    | LiNi <sub>0.8</sub> Co <sub>0.1</sub> Mn <sub>0.1</sub> O <sub>2</sub> | 4.00                                                   | 200                             |
| 2022 <sup>11</sup>    | LiNi <sub>0.8</sub> Co <sub>0.1</sub> Mn <sub>0.1</sub> O <sub>2</sub> | 4.3                                                    | 120                             |
| <b>This work</b>      | <b>LiNi<sub>0.8</sub>Co<sub>0.1</sub>Mn<sub>0.1</sub>O<sub>2</sub></b> | <b>4.5</b>                                             | <b>200</b>                      |

## References

1. C. Yan, Y.-X. Yao, X. Chen, X.-B. Cheng, X.-Q. Zhang, J.-Q. Huang and Q. Zhang, *Angew. Chem. Int. Ed.*, 2018, **57**, 14055-14059.
2. W. Zhang, Q. Wu, J. Huang, L. Fan, Z. Shen, Y. He, Q. Feng, G. Zhu and Y. Lu, *Adv. Mater.*, 2020, **32**, 2001740.
3. J. Holoubek, M. Yu, S. Yu, M. Li, Z. Wu, D. Xia, P. Bhaladhare, M. S. Gonzalez, T. A. Pascal, P. Liu and Z. Chen, *ACS Energy Lett.*, 2020, **5**, 1438-1447.
4. S. Liu, X. Ji, N. Piao, J. Chen, N. Eidson, J. Xu, P. Wang, L. Chen, J. Zhang, T. Deng, S. Hou, T. Jin, H. Wan, J. Li, J. Tu and C. Wang, *Angew. Chem. Int. Ed.*, 2021, **60**, 3661-3671.
5. N. Piao, S. Liu, B. Zhang, X. Ji, X. Fan, L. Wang, P.-F. Wang, T. Jin, S.-C. Liou, H. Yang, J. Jiang, K. Xu, M. A. Schroeder, X. He and C. Wang, *ACS Energy Lett.*, 2021, **6**, 1839-1848.
6. K. Huang, S. Bi, B. Kurt, C. Xu, L. Wu, Z. Li, G. Feng and X. Zhang, *Angew. Chem. Int. Ed.*, 2021, **60**, 19232-19240.
7. Q. Ma, J. Yue, M. Fan, S.-J. Tan, J. Zhang, W.-P. Wang, Y. Liu, Y.-F. Tian, Q. Xu, Y.-X. Yin, Y. You, A. Luo, S. Xin, X.-W. Wu and Y.-G. Guo, *Angew. Chem. Int. Ed.*, 2021, **60**, 16554-16560.
8. H. Wang, J. He, J. Liu, S. Qi, M. Wu, J. Wen, Y. Chen, Y. Feng and J. Ma, *Adv. Funct. Mater.*, 2021, **31**, 2002578.
9. Z. Jiang, Z. Zeng, B. Zhai, X. Li, W. Hu, H. Zhang, S. Cheng and J. Xie, *J. Power Sources*, 2021, **506**, 230086.
10. Q. Zhao, N. W. Utomo, A. L. Kocen, S. Jin, Y. Deng, V. X. Zhu, S. Moganty, G. W.

Coates and L. A. Archer, *Angew. Chem. Int. Ed.*, 2022, **61**, e202116214.

11. Y. Zhang, Y. Wu, H. Li, J. Chen, D. Lei and C. Wang, *Nat. Commun.*, 2022, **13**, 1297.
